# Supplementary material for: Pet dogs’ Behavioural Reaction to Their Caregiver’s Interactions with a Third Party: Join in or Interrupt?
Source: MDPI journal article supplement (doi:10.3390/ani12121574), 2022-06-18
Supplement: s1 [file s1]

# **Pet dogs' behavioural reaction to their caregiver's interactions with a third party: join in or interrupt?**

Sabrina Karl<sup>1</sup>, Kristina Anderle<sup>1</sup>, Christoph J. Völter<sup>1</sup> & Zsófia Virányi<sup>1</sup>

<sup>1</sup>Comparative Cognition, Messerli Research Institute, University of Veterinary Medicine Vienna, Medical University of Vienna, University of Vienna, 1210 Vienna, Austria

## **Supplementary Material**

**Table S1.** Questions of jealousy caregiver questionnaire and summary of descriptive caregivers' reports (N=102).

| <b>Question</b>                                                           | <b>Caregiver report</b>                                                                                                                                                                                                                                                                                          | <b>Percentage</b>                                                 |
|---------------------------------------------------------------------------|------------------------------------------------------------------------------------------------------------------------------------------------------------------------------------------------------------------------------------------------------------------------------------------------------------------|-------------------------------------------------------------------|
| 1) Does your dog react jealous/ jealousy-like towards other dogs?         | Yes.                                                                                                                                                                                                                                                                                                             | 69.61 %                                                           |
|                                                                           | No.                                                                                                                                                                                                                                                                                                              | 30.39%<br><br>(including 8% stated some jealousy-like behaviours) |
| 2) If your dog reacts jealous/ jealousy-like, which behaviours are shown? | Dog squeezing in-between the human-dog interaction, trying to separate the caregiver from the other dog, reacting aggressive by growling, snarling, barking, launching and snapping at the other dog, trying to regain the caregiver's attention and affection, e.g., by jumping at or licking him/ her, showing | 69.61 %                                                           |

|                                                                                          |                                                                                                                                                                             |         |
|------------------------------------------------------------------------------------------|-----------------------------------------------------------------------------------------------------------------------------------------------------------------------------|---------|
|                                                                                          | displacement behaviours like play bowing and sniffing, stress induced signals such as lip licking, whining, yawning, screaming or displaying piloerection and tail-wagging. |         |
| 3) When does your dog display jealous/ jealousy-like behaviours?                         | When the caregiver petted, praised, trained, played with or talked to another dog or when the other dog approached or was too close to the caregiver.                       | 69.61 % |
| 4) Where or in which situations does your dog display jealous/ jealousy-like behaviours? | At home.                                                                                                                                                                    | 36.27 % |
|                                                                                          | In dog zones.                                                                                                                                                               | 15.69 % |
|                                                                                          | During dog walk.                                                                                                                                                            | 15.69 % |
|                                                                                          | Location-independent.                                                                                                                                                       | 6.86 %  |
|                                                                                          | Differed a lot, also dog- and human-dependent.                                                                                                                              | 6.86 %  |
|                                                                                          | The other dog's home.                                                                                                                                                       | 1.96 %  |
|                                                                                          | In dog school.                                                                                                                                                              | 0.98 %  |

**Table S2.** Results of mixed ordinal regression of behavioural ratings in the Introduction and Interaction phase.

|                                            | Estimate | SE    | $\chi^2$ | df | P      |
|--------------------------------------------|----------|-------|----------|----|--------|
| Phase                                      | -1.515   | 0.321 | 26.951   | 1  | <0.001 |
| Treatment <sup>1</sup>                     | -1.142   | 0.523 |          |    |        |
| Human <sup>2</sup>                         | -0.037   | 0.513 |          |    |        |
| Sex <sup>3</sup>                           | -0.236   | 0.365 | 0.417    | 1  | 0.519  |
| Age <sup>4</sup>                           | -0.559   | 0.202 | 8.534    | 1  | 0.003  |
| Treatment <sup>1</sup> :Human <sup>2</sup> | 1.558    | 0.742 | 4.505    | 1  | 0.034  |

Notes: reference categories: <sup>1</sup>vet check; <sup>2</sup>caregiver; <sup>3</sup>female; <sup>4</sup>centered and standardized to a mean of zero and a standard deviation of 1.

**Table S3.** Results of binomial GLM of dogs' first approach of fake dog response in the Reaction phase.

|                        | Estimate | SE    | 95% CI |       | $\chi^2$ | df | P     |
|------------------------|----------|-------|--------|-------|----------|----|-------|
| (Intercept)            | -0.176   | 0.462 | -1.103 | 0.730 |          |    |       |
| Human <sup>1</sup>     | 1.198    | 0.528 | 0.199  | 2.293 | 5.580    | 1  | 0.018 |
| Treatment <sup>2</sup> | 0.834    | 0.508 | -0.147 | 1.860 | 2.771    | 1  | 0.096 |
| Age <sup>3</sup>       | -0.034   | 0.264 | -0.540 | 0.473 | 0.016    | 1  | 0.898 |
| Sex <sup>4</sup>       | 0.477    | 0.509 | -0.511 | 1.502 | 0.889    | 1  | 0.346 |

Notes: reference categories: <sup>1</sup>caregiver; <sup>2</sup>vet check; <sup>4</sup>female; <sup>3</sup>centered and standardized to a mean of zero and a standard deviation of 1.

**Table S4.** Results of binomial GLM of dogs' friendly interaction with fake dog response in the Reaction phase.

|                        | Estimate | SE    | 95% CI |        | $\chi^2$ | df | P     |
|------------------------|----------|-------|--------|--------|----------|----|-------|
| (Intercept)            | -1.581   | 0.531 | -2.714 | -0.605 |          |    |       |
| Human <sup>1</sup>     | -1.076   | 0.536 | -2.185 | -0.058 | 4.301    | 1  | 0.038 |
| Treatment <sup>2</sup> | 1.459    | 0.564 | 0.404  | 2.644  | 7.545    | 1  | 0.006 |
| Age <sup>3</sup>       | -0.383   | 0.273 | -0.946 | 0.138  | 2.054    | 1  | 0.152 |
| Sex <sup>4</sup>       | -0.268   | 0.518 | -1.305 | 0.745  | 0.270    | 1  | 0.604 |

Notes: reference categories: <sup>1</sup>caregiver; <sup>2</sup>vet check; <sup>4</sup>female; <sup>3</sup>centered and standardized to a mean of zero and a standard deviation of 1.

**Table S5.** Results of binomial GLM of dogs' blocking response in the Reaction phase.

|                        | Estimate | SE    | 95% CI |        | $\chi^2$ | df | P     |
|------------------------|----------|-------|--------|--------|----------|----|-------|
| (Intercept)            | -0.305   | 0.414 | -1.132 | 0.503  |          |    |       |
| Human <sup>1</sup>     | -1.043   | 0.431 | -1.910 | -0.214 | 6.111    | 1  | 0.013 |
| Treatment <sup>2</sup> | 0.325    | 0.434 | -0.519 | 1.189  | 0.567    | 1  | 0.451 |
| Age <sup>3</sup>       | -0.407   | 0.225 | -0.865 | 0.022  | 3.456    | 1  | 0.063 |
| Sex <sup>4</sup>       | 0.525    | 0.429 | -0.311 | 1.378  | 1.514    | 1  | 0.219 |

Notes: reference categories: <sup>1</sup>caregiver; <sup>2</sup>vet check; <sup>4</sup>female; <sup>3</sup>centered and standardized to a mean of zero and a standard deviation of 1.

**Table S6.** Results of negative-binomial GLM of dogs' sniffing of fake dog's anal region response in the Reaction phase.

|                        | Estimate | SE    | 95% CI |        | $\chi^2$ | df | P     |
|------------------------|----------|-------|--------|--------|----------|----|-------|
| (Intercept)            | 0.783    | 0.170 | 0.449  | 1.112  |          |    |       |
| Human <sup>1</sup>     | -0.418   | 0.173 | -0.759 | -0.079 | 5.841    | 1  | 0.016 |
| Treatment <sup>2</sup> | 0.203    | 0.174 | -0.138 | 0.545  | 1.357    | 1  | 0.244 |

|                  | Estimate | SE    | 95% CI |       | $\chi^2$ | df | P     |
|------------------|----------|-------|--------|-------|----------|----|-------|
| Age <sup>3</sup> | -0.162   | 0.089 | -0.342 | 0.016 | 3.173    | 1  | 0.075 |
| Sex <sup>4</sup> | 0.181    | 0.172 | -0.157 | 0.520 | 1.101    | 1  | 0.294 |

Notes: reference categories: <sup>1</sup>caregiver; <sup>2</sup>vet check; <sup>4</sup>female; <sup>3</sup>centered and standardized to a mean of zero and a standard deviation of 1.

**Table S7.** Results of binomial GLM of dogs' friendly interaction with human response in the Reaction phase.

|                        | Estimate | SE    | 95% CI |       | $\chi^2$ | df | P     |
|------------------------|----------|-------|--------|-------|----------|----|-------|
| (Intercept)            | -0.609   | 0.417 | -1.454 | 0.196 |          |    |       |
| Human <sup>1</sup>     | -0.809   | 0.430 | -1.670 | 0.022 | 3.640    | 1  | 0.056 |
| Treatment <sup>2</sup> | 0.698    | 0.435 | -0.144 | 1.571 | 2.634    | 1  | 0.105 |
| Age <sup>3</sup>       | -0.183   | 0.220 | -0.626 | 0.244 | 0.698    | 1  | 0.403 |
| Sex <sup>4</sup>       | 0.121    | 0.428 | -0.720 | 0.965 | 0.080    | 1  | 0.777 |

Notes: reference categories: <sup>1</sup>caregiver; <sup>2</sup>vet check; <sup>4</sup>female; <sup>3</sup>centered and standardized to a mean of zero and a standard deviation of 1.

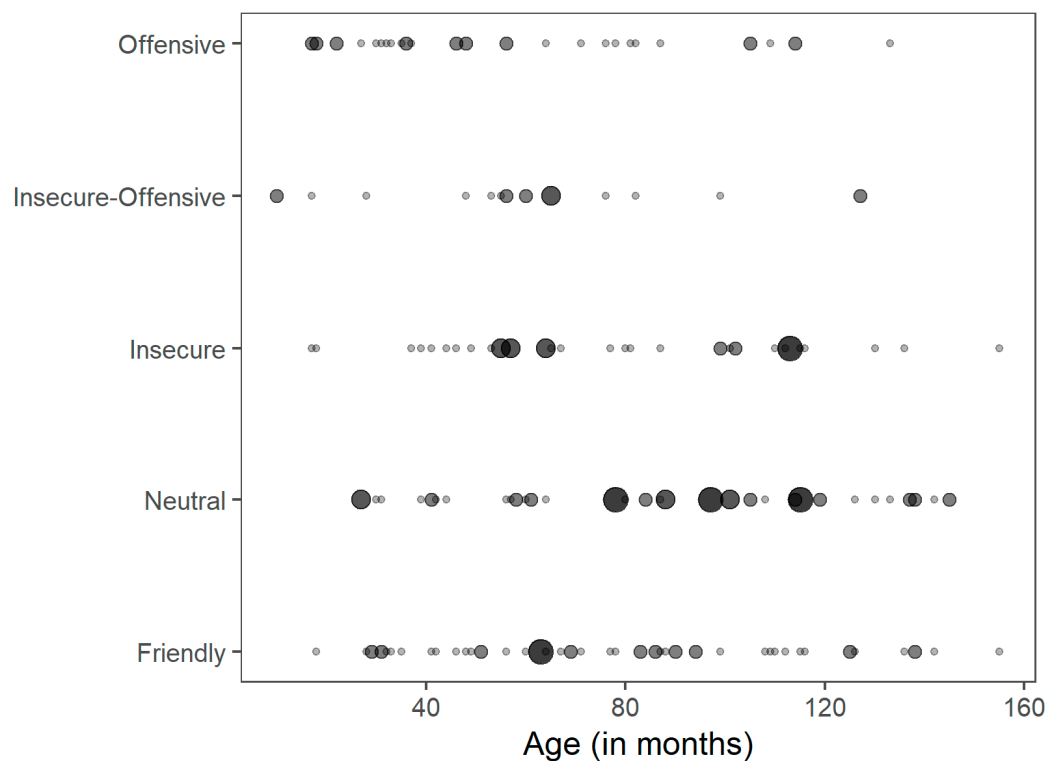

**Figure S1.** Behavioural ratings in the Introduction and Interaction phases as a function of dogs' age (in months). The size of the dots is proportional to the number of represented data points.
