# Supplementary material for: Pet dogs’ Behavioural Reaction to Their Caregiver’s Interactions with a Third Party: Join in or Interrupt?
Source: Animals (Basel). 2022 Jun 18;12(12):1574. doi: 10.3390/ani12121574 (PMC9219478; doi:10.3390/ani12121574)
Supplement: Supplementary file 1 [file animals-12-01574-s001.zip › 210415_Karl et al_Pet dogsí» behavioural reaction to their caregiverí»s IA_Supplementary Material_ET1_dog sample_demograpghics_conditions.xlsx]

## Sheet: dog details
Dog name	Breed	Birth date	Age (in years)	Sex	Castrated	Test group
Miss Face	Alaskan Husky	2007-01-01	12	female	yes	CP
Emma7	German Shepherd	2013-04-28	6	female	yes	SV
Hanya	German Shepherd	2014-08-04	5	female	no	SP
Mädi	Mix	2011-05-14	8	female	yes	CV
Pamina2	American Staffordshire Terrier-Mix	2014-11-15	5	female	yes	CV
Gismo4	Border Collie-Mix	2015-01-16	4	male	no	CP
Sheila	Border Collie-Mix	2012-12-01	7	female	no	SV
Charly5	Spanish Water Dog	2016-08-25	3	male	yes	SP
Butzi	Welsh Corgi Pembroke	2010-04-05	9	male	yes	SP
Barbarix2	Bearded Collie	2013-02-21	6	male	yes	CV
Dottie	Mix	2010-08-28	9	female	yes	CP
Dusty	Border Collie	2017-05-26	2	female	yes	CV
Grisu2	Magyar Vizla	2018-10-22	11 months	male	no	CV
Nils2	Golden Retriever	2014-05-15	5	male	no	CP
Milow	Labrador Retriever	2011-02-24	8	male	no	SP
Jia	Labrador Retriever	2017-04-29	2	female	no	CV
Sunny10	Poodle Miniature	2017-02-25	2	female	yes	SV
Sambesi	Rhodesian Ridgeback	2016-01-10	3	female	yes	SV
Batman	Jack Russel	2007-11-07	11	male	yes	SP
Sixtus	Brussels Griffon	2016-07-30	3	male	no	SV
Jolie	Pinscher-Whippet-Mix	2010-04-04	9	female	yes	CV
Riu	Australian Shepherd	2018-03-28	1	female	no	CP
Flamme	Berger des Pyrénées à face rase	2008-03-09	11	male	no	SV
Amy8	Border Collie	2010-03-12	9	female	no	CV
Amie	German Sheperd-Mix	2018-03-01	1	female	yes	CP
Maylo	Border Collie-Mix	2015-11-13	4	male	yes	SP
Helena	Standard Poodle	2011-07-25	8	female	no	CV
Emil6	Jack Russel-Mix	2012-05-22	7	male	yes	CP
Zoe4	Zwergspitz	2008-04-13	11	femlale	yes	CP
Marlboro	Whippet	2016-09-19	3	male	yes	SV
Freya	Husky-Malamute-Mix	2013-09-20	6	female	no	SP
Poppy2	Miniature Poodle-Spaniel-Mix	2014-08-11	5	female	yes	SP
Dante	Galgo	2015-01-01	4	male	yes	CP
Bärbel	Dackel-Terrier-Mix	2014-08-25	5	female	no	SV
Eowyn	Terrier-Mix	2017-10-24	2	female	yes	CV
Leia	Beagle	2011-10-24	8	female	yes	CP
Guinness3	Labrador-Mix	2012-05-01	7	male	yes	SV
Hailey	Golden Retriever	2012-09-20	7	female	no	SP
Nanouk2	Australian Sheperd	2012-05-18	7	female	yes	SP
Lenni	Greyhound-Magyar agár-Mix	2013-01-12	6	male	yes	CV
Arkani2	Belgian Tervuren	2014-05-05	5	male	no	CV
Snoopy6	Beagle	2012-03-01	7	male	yes	CV
Orlando	Long-Haired Collie	2010-08-09	9	male	no	CP
Sophie	Papillon	2015-01-01	4	female	yes	SV
Jo-Jo3	Kangal	2014-06-19	5	male	yes	CP
Bella5	Kangal	2012-01-01	7	female	yes	SV
Cindy7	Mix	2006-10-15	13	female	yes	SP
Sepp	Beagle	2012-06-11	7	male	yes	SV
Laiki	Dobermann-Mix	2011-01-01	8	male	yes	SP
Finn7	Iceland Dog	2018-04-25	1	male	no	SV
Emil7	Parson Jack Russel Terrier	2015-06-14	4	male	yes	CV
Yuki4	Mix	2015-08-22	4	female	no	CP
Bailey2	Staff Bullterrier	2014-05-03	5	female	yes	SP
Fiby2	French Bulldog	2014-12-04	5	female	yes	CV
Ame	Akita Inu	2016-03-16	3	male	no	CP
Dada	Shepherd-Pinscher-Mix	2016-04-10	3	female	yes	SV
Luca2	Scotia Duck Tolling Retriever	2016-07-01	3	male	yes	SV
Anouk3	Labrador Retriever	2016-05-03	3	female	yes	SP
Suka-Sevilla	Galgo	2010-04-30	9	female	yes	SP
Sammy8	Labradoodle	2017-01-23	2	male	yes	SP
Finja2	Labrador-Shepherd-Mix	2017-07-09	2	female	no	CV
Eisbär	Maltese	2018-04-02	1	male	yes	SP
Lumpi	Dackel-Mix	2015-10-15	4	male	no	CV
Mia7	Golden Retriever	2017-04-30	2	female	no	CP
Cassy3	Mix	2013-04-15	6	female	yes	SV
Maylo2	Golden Retriever	2014-06-12	5	male	yes	CV
Scampi	Labrador-Mix	2014-01-01	5	male	yes	CP
Pepina	Boxer	2013-04-01	6	female	yes	CP
Zeus3	Mix	2015-01-14	4	male	no	SV
Campino	Romanian Mioritic Shepherd	2017-03-01	2	male	yes	SV
Spin	Shetland Sheepdog	2015-12-06	4	male	no	SP
Levi	Mix	2015-10-03	4	male	yes	SP
Kiki2	Mix	2015-02-04	4	female	no	CV
Cameron	Border Collie	2012-10-14	7	male	no	CV
Nana3	Mix	2014-03-01	5	female	no	CP
Monty2	Border Collie	2010-01-25	9	male	yes	CP
Kayleigh	Border Collie	2011-09-15	8	female	no	CP
Thor	Husky	2017-01-01	2	male	yes	CV
Blacky4	Mix	2011-07-08	8	male	yes	CV
Chasie	Boder Collie	2009-05-08	10	female	yes	SV
Gatsby	Border Collie	2010-08-10	9	male	no	SV
Linus	Australian Shepherd	2014-06-05	5	male	no	SP
Aeden	Border Collie	2008-04-30	11	male	yes	SV
Paul2	Jack Russell Terrier	2017-03-01	2	male	no	SV
Emily2	Border Collie	2008-06-11	11	female	yes	CP
Arielle	Border Collie	2015-05-31	4	female	no	SP
Carlisle	Border Collie	2011-01-30	8	male	no	CP
Balian	Border Collie	2010-03-21	9	male	no	SP
Akin	Rhodesian Ridgeback	2009-04-22	10	male	yes	CV
Zuri	Rhodesian Ridgeback	2009-11-17	10	female	yes	CP
Runa	Czechoslovakian Wolfhound-Mix	2015-03-27	4	female	yes	CV
Maroni	Zwergpinscher	2012-12-12	7	male	yes	CP
Emily7	Collie-Mix	2009-01-01	10	female	yes	SP
Müsli	Border Collie	2013-05-17	6	male	yes	SP
Maeva	Border Collie-Australian Shepherd-Mix	2011-06-06	8	female	no	SP
Cliff	Border Collie	2014-06-09	5	male	no	CV
Apryl	Border Collie	2009-03-24	10	female	yes	CV
Ronja4	Jack Russell-Beagle-Mix	2011-06-06	8	female	yes	SV
Hagrid	Drahthaar-Mix	2010-03-31	9	male	yes	CP
Mulan	Labrador-Drahthaar-Mix	2010-03-31	9	female	yes	SP
Schoko2	Magya Vizla	2010-05-07	9	female	yes	SV
Akina	Akita Inu	2008-10-22	11	female	yes	SV
